# Supplementary material
Source: ML conference proceedings conference paper supplement (https://openreview.net/forum?id=aUt0hjq4Sn)
Supplement: supplementary_material [file attachment]

# Supplementary Materials: GeNSeg-Net: A General Segmentation Framework for Any Nucleus in Immunohistochemistry Images

Anonymous Authors

## 1 DATASET

The composition and division of our private systematic dataset are summarized in Table 1.

## 2 DISCUSSION

In this study, a classic image-to-image translation generative architecture [3] without any condition demonstrates the effectiveness of our framework. Moving forward, our objective is to explore more sophisticated generative adversarial network (GAN) [4–7, 11] architectures and diffusion model [9, 10, 12] architectures specifically tailored for nucleus enhancement.

For the segmentation task, three classes are predicted by a standard U-Net [8], followed by watershed for post-processing. Since the segmentation model operates independently of the enhancement model, there is potential to leverage more advanced and specialized networks [1, 2]. However, this inevitably increases complexity to the entire framework, necessitating a careful balance between segmentation accuracy and processing speed.

The introduction of generative models into segmentation tasks represents a pioneering endeavor. In our future work, we plan to extend the framework proposed in this paper to tasks such as multi-organ tissue segmentation and beyond.

## REFERENCES

- [1] Shengcong Chen, Changxing Ding, Minfeng Liu, Jun Cheng, and Dacheng Tao. 2023. CPP-net: Context-aware polygon proposal network for nucleus segmentation. *IEEE Transactions on Image Processing* 32 (2023), 980–994.
- [2] Yue Han, Yang Lei, Viktor Shkolnikov, Daisy Xin, Alicia Auduong, Steven Barcelo, Jan Allebach, and Edward J Delp. 2023. An ensemble method with edge awareness for abnormally shaped nuclei segmentation. In *Proceedings of the IEEE/CVF Conference on Computer Vision and Pattern Recognition*. 4314–4324.
- [3] Phillip Isola, Jun-Yan Zhu, Tinghui Zhou, and Alexei A Efros. 2017. Image-to-image translation with conditional adversarial networks. In *Proceedings of the IEEE Conference on Computer Vision and Pattern Recognition*. 1125–1134.
- [4] Kanghyeok Ko, Taesun Yeom, and Minhyeok Lee. 2023. Superstargan: Generative adversarial networks for image-to-image translation in large-scale domains. *Neural Networks* 162 (2023), 330–339.
- [5] Taesung Park, Ming-Yu Liu, Ting-Chun Wang, and Jun-Yan Zhu. 2019. Semantic image synthesis with spatially-adaptive normalization. In *Proceedings of the IEEE/CVF Conference on Computer Vision and Pattern Recognition*. 2337–2346.
- [6] Taesung Park, Jun-Yan Zhu, Oliver Wang, Jingwan Lu, Eli Shechtman, Alexei Efros, and Richard Zhang. 2020. Swapping autoencoder for deep image manipulation. In *Advances in Neural Information Processing Systems*, Vol. 33. 7198–7211.
- [7] Gaurav Parmar, Krishna Kumar Singh, Richard Zhang, Yijun Li, Jingwan Lu, and Jun-Yan Zhu. 2023. Zero-shot image-to-image translation. In *ACM SIGGRAPH 2023 Conference Proceedings*. 1–11.
- [8] Olaf Ronneberger, Philipp Fischer, and Thomas Brox. 2015. U-net: Convolutional networks for biomedical image segmentation. In *International Conference on Medical Image Computing and Computer-Assisted Intervention*. Springer, 234–241.
- [9] Aman Shrivastava and P Thomas Fletcher. 2023. NASDM: nuclei-aware semantic histopathology image generation using diffusion models. In *International Conference on Medical Image Computing and Computer-Assisted Intervention*. Springer, 786–796.
- [10] Narek Tumanyan, Michal Geyer, Shai Bagon, and Tali Dekel. 2023. Plug-and-play diffusion features for text-driven image-to-image translation. In *Proceedings of the IEEE/CVF Conference on Computer Vision and Pattern Recognition*. 1921–1930.
- [11] Ting-Chun Wang, Ming-Yu Liu, Jun-Yan Zhu, Andrew Tao, Jan Kautz, and Bryan Catanzaro. 2018. High-resolution image synthesis and semantic manipulation with conditional gans. In *Proceedings of the IEEE Conference on Computer Vision and Pattern Recognition*. 8798–8807.

- [12] Xinyi Yu, Guanbin Li, Wei Lou, Siqi Liu, Xiang Wan, Yan Chen, and Haofeng Li. 2023. Diffusion-based data augmentation for nuclei image segmentation. In *International Conference on Medical Image Computing and Computer-Assisted Intervention*. Springer, 592–602.

**Table 1: Composition and division of our private dataset with annotation. Left and right of "/" represent the number of brightfield and fluorescence images respectively.**

| Data subset              | Total nuclei |              | Cancer type |       |       |         |        |              |             |       |
|--------------------------|--------------|--------------|-------------|-------|-------|---------|--------|--------------|-------------|-------|
|                          | Brightfield  | Fluorescence | Lung        | Liver | Colon | Stomach | Cervix | Osteosarcoma | Tuberculoma | Lymph |
| Training and validation  | 58,001       | 60,960       | 60/60       | 60/60 | 60/60 | 60/60   | –      | –            | –           | –     |
| Same tissue testing      | 17,440       | 17,984       | 20/20       | 20/20 | 20/20 | 20/20   | –      | –            | –           | –     |
| Different tissue testing | 19,674       | 19,286       | –           | –     | –     | –       | 20/20  | 20/20        | 20/20       | 20/20 |
| Total                    | 95,115       | 98,230       | 80/80       | 80/80 | 80/80 | 80/80   | 20/20  | 20/20        | 20/20       | 20/20 |
